# Supplementary material for: ILDR2 has a negligible role in hepatic steatosis
Source: PubMed Central journal article supplement (PMC5976177; doi:10.1371/journal.pone.0197548), 2018-05-30
Supplement: pone.0197548.s001.pdf [file pone.0197548.s001.pdf]

**S1 Table: RNAseq candidate gene list**

| Gene name            | Average counts |           |                                | p <sub>adj</sub> values |                                         |                                            |
|----------------------|----------------|-----------|--------------------------------|-------------------------|-----------------------------------------|--------------------------------------------|
|                      | AD-lacZ        | ADKD      | <i>Ildr2</i> <sup>Adv</sup> KO | ADKD vs. AD-lacZ        | ADKD vs. <i>Ildr2</i> <sup>Adv</sup> KO | AD-lacZ vs. <i>Ildr2</i> <sup>Adv</sup> KO |
| <i>Rps19bp1</i>      | 276            | 66        | 267                            | 6.98E-28                | 6.49E-18                                | 0.199                                      |
| <i>Slc39a1</i>       | 1314           | 422       | 1524                           | 2.18E-26                | 1.42E-31                                | 1.000                                      |
| <i>Slc27a4</i>       | 1167           | 473       | 1504                           | 3.05E-23                | 1.04E-08                                | 0.666                                      |
| <i>Aldh4a1</i>       | 5277           | 2521      | 6117                           | 3.63E-19                | 9.96E-05                                | 1.000                                      |
| <i>Ndst1</i>         | 3091           | 1464      | 3079                           | 8.28E-19                | 1.37E-10                                | 0.127                                      |
| <i>Ppp1ca</i>        | 3562           | 1720      | 4107                           | 4.12E-18                | 1.20E-15                                | 0.956                                      |
| <i>Rab1b</i>         | 3043           | 1523      | 3700                           | 4.45E-16                | 3.10E-16                                | 0.882                                      |
| <i>2900097C17Rik</i> | 1326           | 662       | 1417                           | 2.73E-14                | 5.36E-10                                | 0.478                                      |
| <i>Ptp4a1</i>        | 529            | 246       | 558                            | 4.76E-13                | 1.85E-06                                | 0.463                                      |
| <i>6330578E17Rik</i> | 2685           | 1434      | 2716                           | 5.05E-13                | 2.98E-07                                | 0.174                                      |
| <i>Tbc1d13</i>       | 852            | 426       | 1090                           | 1.00E-12                | 5.29E-15                                | 0.571                                      |
| <i>Ubf1</i>          | 972            | 494       | 1155                           | 1.28E-12                | 3.30E-12                                | 1.000                                      |
| <i>Gm98</i>          | 1354           | 708       | 1630                           | 1.54E-12                | 1.30E-12                                | 0.948                                      |
| <i>Tmem123</i>       | 1090           | 563       | 1404                           | 2.37E-12                | 5.18E-15                                | 0.520                                      |
| <i>Nt5dc2</i>        | 336            | 151       | 374                            | 1.68E-11                | 2.06E-09                                | 0.819                                      |
| <i>Neo1</i>          | 671            | 345       | 676                            | 7.21E-11                | 1.09E-05                                | 0.224                                      |
| <i>Sumf2</i>         | 291            | 135       | 290                            | 9.58E-10                | 8.90E-06                                | 0.283                                      |
| <i>Acpl2</i>         | 266            | 124       | 338                            | 4.16E-09                | 9.22E-11                                | 0.711                                      |
| <i>Pcgf2</i>         | 181            | 79        | 210                            | 2.44E-08                | 2.32E-04                                | 1.000                                      |
| <i>Cpsf2</i>         | 783            | 448       | 841                            | 4.44E-08                | 9.82E-06                                | 0.539                                      |
| <i>Wfdc2</i>         | 201            | 59        | 190                            | 5.30E-08                | 6.97E-09                                | 0.260                                      |
| <i>Ccdc50</i>        | 1569           | 946       | 2019                           | 7.78E-08                | 1.72E-10                                | 0.518                                      |
| <i>Tspan4</i>        | 626            | 359       | 772                            | 1.70E-07                | 1.80E-04                                | 0.876                                      |
| <i>Reck</i>          | 81             | 27        | 87                             | 4.09E-07                | 6.94E-06                                | 0.776                                      |
| <i>Pef1</i>          | 1057           | 642       | 1345                           | 4.99E-07                | 3.00E-09                                | 0.599                                      |
| <i>Scpep1</i>        | 1018           | 618       | 1254                           | 5.33E-07                | 2.74E-08                                | 0.814                                      |
| <i>Diablo</i>        | 560            | 326       | 548                            | 7.33E-07                | 2.44E-03                                | 0.148                                      |
| <i>Icmt</i>          | 1088           | 675       | 1172                           | 1.65E-06                | 1.36E-04                                | 0.535                                      |
| <i>Celf1</i>         | 3216           | 2074      | 3415                           | 1.96E-06                | 4.12E-04                                | 0.405                                      |
| <b><i>Dgka</i></b>   | <b>160</b>     | <b>75</b> | <b>187</b>                     | <b>2.38E-06</b>         | <b>1.57E-06</b>                         | <b>1.000</b>                               |
| <i>Ssu72</i>         | 986            | 613       | 1306                           | 2.66E-06                | 1.26E-09                                | 0.360                                      |

|                      |      |      |      |          |          |       |
|----------------------|------|------|------|----------|----------|-------|
| <i>Stat6</i>         | 1590 | 1019 | 1825 | 4.42E-06 | 1.33E-05 | 0.946 |
| <i>Chtf8</i>         | 1247 | 792  | 1459 | 4.68E-06 | 5.19E-06 | 1.000 |
| <i>Dpp8</i>          | 1734 | 1118 | 1816 | 5.03E-06 | 1.21E-03 | 0.352 |
| <i>lpo5</i>          | 1941 | 1256 | 2423 | 5.06E-06 | 2.05E-04 | 0.748 |
| <i>Snx4</i>          | 802  | 500  | 980  | 6.65E-06 | 6.53E-07 | 0.884 |
| <i>1810011010Rik</i> | 785  | 491  | 927  | 7.77E-06 | 4.37E-06 | 1.000 |
| <i>Trappc9</i>       | 395  | 232  | 451  | 8.09E-06 | 2.62E-05 | 0.930 |
| <i>Erp29</i>         | 949  | 602  | 1228 | 8.70E-06 | 2.19E-08 | 0.489 |
| <i>Eif3h</i>         | 2005 | 1332 | 2224 | 2.32E-05 | 3.12E-04 | 0.712 |
| <i>Pja2</i>          | 1062 | 693  | 1459 | 3.17E-05 | 1.63E-09 | 0.191 |
| <i>Arl4d</i>         | 531  | 312  | 756  | 4.58E-05 | 8.90E-05 | 0.370 |
| <i>Cdt1</i>          | 233  | 121  | 366  | 5.32E-05 | 6.90E-05 | 0.207 |
| <i>Rab34</i>         | 205  | 97   | 260  | 6.48E-05 | 3.52E-09 | 0.749 |
| <i>Pogk</i>          | 155  | 82   | 225  | 7.69E-05 | 6.56E-09 | 0.216 |
| <i>Gtf3c1</i>        | 1771 | 1062 | 1764 | 9.27E-05 | 1.34E-03 | 0.140 |
| <i>Pofut1</i>        | 410  | 255  | 540  | 1.02E-04 | 2.24E-07 | 0.454 |
| <i>Atr</i>           | 601  | 389  | 716  | 1.29E-04 | 8.64E-05 | 1.000 |
| <i>Tbc1d20</i>       | 807  | 534  | 894  | 1.38E-04 | 1.04E-03 | 0.733 |
| <i>Rpa2</i>          | 295  | 155  | 341  | 1.44E-04 | 6.00E-04 | 1.000 |
| <i>Nol3</i>          | 24   | 4    | 36   | 1.49E-04 | 1.04E-07 | 0.533 |
| <i>Psm14</i>         | 1404 | 955  | 1472 | 1.54E-04 | 9.94E-03 | 0.359 |
| <i>Tax1bp3</i>       | 72   | 30   | 82   | 1.58E-04 | 2.18E-04 | 0.969 |
| <i>Tab2</i>          | 1916 | 1221 | 2563 | 1.77E-04 | 2.59E-10 | 0.272 |
| <i>Cenpm</i>         | 148  | 62   | 167  | 1.77E-04 | 6.02E-07 | 0.915 |
| <i>Adss</i>          | 1756 | 1163 | 2309 | 1.97E-04 | 5.07E-04 | 0.602 |
| <i>Zdhhc2</i>        | 178  | 74   | 216  | 1.97E-04 | 2.57E-04 | 1.000 |
| <i>Ern1</i>          | 836  | 554  | 886  | 2.51E-04 | 5.07E-03 | 0.454 |
| <i>Sox12</i>         | 129  | 68   | 142  | 2.55E-04 | 3.50E-03 | 0.850 |
| <i>Slc4a4</i>        | 3541 | 2086 | 3876 | 2.74E-04 | 5.33E-07 | 0.621 |
| <i>Setd8</i>         | 1595 | 1039 | 1698 | 2.80E-04 | 1.04E-03 | 0.440 |
| <i>S100a16</i>       | 385  | 245  | 425  | 2.90E-04 | 1.66E-03 | 0.753 |
| <i>Rassf5</i>        | 334  | 210  | 429  | 3.19E-04 | 4.41E-06 | 0.623 |
| <i>Tmem189</i>       | 331  | 208  | 364  | 3.42E-04 | 1.95E-03 | 0.751 |
| <i>Plod3</i>         | 447  | 290  | 618  | 3.49E-04 | 6.00E-08 | 0.220 |
| <i>Scn8a</i>         | 38   | 12   | 46   | 4.04E-04 | 1.18E-04 | 1.000 |
| <i>Pcnxl3</i>        | 1147 | 795  | 1261 | 5.32E-04 | 4.14E-03 | 0.677 |
| <i>Akap11</i>        | 1114 | 771  | 1316 | 5.49E-04 | 2.44E-04 | 1.000 |

|                      |       |       |       |          |          |       |
|----------------------|-------|-------|-------|----------|----------|-------|
| <i>2310022B05Rik</i> | 445   | 291   | 599   | 5.60E-04 | 5.46E-07 | 0.336 |
| <i>Vps39</i>         | 584   | 391   | 754   | 5.91E-04 | 4.03E-06 | 0.543 |
| <i>Nacc1</i>         | 1123  | 783   | 1361  | 7.35E-04 | 9.58E-05 | 0.911 |
| <i>Zswim7</i>        | 182   | 107   | 196   | 7.37E-04 | 5.19E-03 | 0.680 |
| <i>Entpd5</i>        | 11076 | 7174  | 13493 | 7.81E-04 | 9.33E-08 | 0.877 |
| <i>Ass1</i>          | 4516  | 2710  | 8270  | 8.68E-04 | 2.85E-03 | 0.133 |
| <i>Pip4k2c</i>       | 656   | 449   | 870   | 9.94E-04 | 1.80E-06 | 0.382 |
| <i>Dguok</i>         | 231   | 144   | 250   | 1.15E-03 | 6.84E-03 | 0.693 |
| <i>Hfe</i>           | 1107  | 783   | 1321  | 1.41E-03 | 4.08E-04 | 1.000 |
| <i>Atg16l2</i>       | 212   | 133   | 238   | 2.03E-03 | 3.74E-03 | 0.892 |
| <i>P4hb</i>          | 21192 | 15697 | 28758 | 2.26E-03 | 1.49E-05 | 0.181 |
| <i>Ctsz</i>          | 4039  | 2972  | 4668  | 2.40E-03 | 2.43E-03 | 0.977 |
| <i>P4ha2</i>         | 131   | 59    | 153   | 2.61E-03 | 2.92E-03 | 1.000 |
| <i>Slc34a2</i>       | 47    | 13    | 38    | 2.86E-03 | 6.03E-03 | 0.350 |
| <i>Nle1</i>          | 85    | 45    | 123   | 3.35E-03 | 5.77E-06 | 0.358 |
| <i>Grina</i>         | 3684  | 2736  | 4162  | 3.76E-03 | 8.64E-03 | 0.835 |
| <i>Gnl3l</i>         | 445   | 311   | 630   | 5.38E-03 | 8.05E-07 | 0.155 |
| <i>Unc13b</i>        | 258   | 132   | 309   | 5.41E-03 | 3.97E-06 | 0.998 |
| <i>Tesk1</i>         | 476   | 333   | 563   | 5.89E-03 | 1.98E-03 | 1.000 |
| <i>Mcm3</i>          | 371   | 248   | 546   | 6.06E-03 | 4.12E-03 | 0.346 |
| <i>Maged1</i>        | 2143  | 1603  | 2458  | 6.93E-03 | 8.08E-03 | 0.938 |
| <i>Frmd8</i>         | 522   | 359   | 738   | 6.97E-03 | 1.74E-07 | 0.139 |
| <i>Eaf1</i>          | 1713  | 1276  | 2136  | 7.07E-03 | 7.08E-04 | 0.725 |
| <i>Inpp1</i>         | 1205  | 890   | 1596  | 7.12E-03 | 1.70E-05 | 0.351 |
| <i>4732418C07Rik</i> | 478   | 338   | 563   | 7.12E-03 | 3.10E-03 | 1.000 |
| <i>Slk</i>           | 1319  | 980   | 1676  | 8.11E-03 | 1.49E-04 | 0.606 |
| <i>Comtd1</i>        | 99    | 57    | 151   | 8.13E-03 | 1.72E-06 | 0.163 |
| <i>Dock8</i>         | 823   | 553   | 1011  | 8.68E-03 | 1.93E-05 | 0.848 |
| <i>Pdia4</i>         | 4016  | 2883  | 4695  | 8.70E-03 | 5.53E-04 | 1.000 |
| <i>Echdc3</i>        | 948   | 700   | 1165  | 9.08E-03 | 7.53E-04 | 0.828 |
| <i>Galns</i>         | 352   | 246   | 490   | 9.20E-03 | 6.04E-06 | 0.228 |
| <i>1110008P14Rik</i> | 390   | 275   | 474   | 9.37E-03 | 1.52E-03 | 0.928 |
| <i>Edem1</i>         | 3313  | 2515  | 4237  | 9.87E-03 | 1.16E-04 | 0.533 |
| <i>AI597479</i>      | 322   | 223   | 410   | 9.87E-03 | 3.30E-04 | 0.684 |
